# Supplementary material for: Binding of hairpin pyrrole and imidazole polyamides to DNA: relationship between torsion angle and association rate constants
Source: PubMed Central journal article supplement (PMC3526260; doi:10.1093/nar/gks897), 2012-10-05
Supplement: supp_gks897_nar-01297-f-2012-File006.pdf [file supp_gks897_nar-01297-f-2012-File006.pdf]

## **SUPPLEMENTARY DATA**

### **Binding of Hairpin Pyrrole and Imidazole Polyamides to DNA:**

#### **Relationship between Torsion Angle and Association Rate Constants**

**Yong-Woon Han, Tomoko Matsumoto, Hiroaki Yokota, Gengo Kashiwazaki,  
Hironobu Morinaga, Kaori Hashiya, Toshikazu Bando, Yoshie Harada and  
Hiroshi Sugiyama**

#### **Supplementary information Contents**

Table S1. Binding affinity of **1–5**

Figure S1. Sequences of 5'-biotinylated hairpin DNAs (ODN6–10).

Figure S2. SPR sensorgrams for the interaction of Py-Im polyamides with hairpin DNAs immobilized on a sensor chip SA.

Figure S3. Measurements of the calculated structures in Figure 4.

Figure S4. Measurements of the structures of 4-ring Py-Im polyamides derived by *ab initio* quantum chemical calculation.

Table S1. Binding affinity of **1–5**.

| Py-Im polyamide <sup>a</sup>                                                               | $K_D$ ( $10^{-9}$ M)               | $k_a$ ( $10^4$ M <sup>-1</sup> s <sup>-1</sup> ) | $k_d$ ( $10^{-2}$ s <sup>-1</sup> ) | $\Delta G^{0b}$ (kcal/mol) |
|--------------------------------------------------------------------------------------------|------------------------------------|--------------------------------------------------|-------------------------------------|----------------------------|
| <b>1</b>  | $6.1 \pm 0.62$ (0.41) <sup>c</sup> | $180 \pm 25$                                     | $1.1 \pm 0.15$                      | -11.2                      |
| <b>2</b>  | $13 \pm 1.0$ (0.28) <sup>d</sup>   | $180 \pm 31$                                     | $2.3 \pm 0.36$                      | -10.8                      |
| <b>3</b>  | $25 \pm 5.8$ (1.4) <sup>e</sup>    | $51 \pm 24$                                      | $1.3 \pm 0.61$                      | -10.4                      |
| <b>4</b>  | $110 \pm 51$ (0.44) <sup>f</sup>   | $18 \pm 9.3$                                     | $2.0 \pm 0.15$                      | -9.5                       |
| <b>5</b>  | $250 \pm 66$ (0.22) <sup>g</sup>   | $8.9 \pm 4.7$                                    | $2.2 \pm 0.70$                      | -9.0                       |

<sup>a</sup>Closed circle and Open circle indicate Im and Py, respectively. The target DNAs of **1–5** are ODN6, 7, 8, 9 and 10, respectively.

<sup>b</sup> $\Delta G^0$  values are calculated from the equation,  $= -RT\ln(1/K_D)$ , where R is universal gas constant, 1.987 cal/mol•K; T is absolute temperature in a unit of K, here 298.15 K.

<sup>c</sup>The number in parentheses indicates the relative affinity to **1**/ODN1 in Table 1.

<sup>d</sup>The number in parentheses indicates the relative affinity to **2**/ODN2 in Table 1.

<sup>e</sup>The number in parentheses indicates the relative affinity to **3**/ODN3 in Table 1.

<sup>f</sup>The number in parentheses indicates the relative affinity to **4**/ODN4 in Table 1.

<sup>g</sup>The number in parentheses indicates the relative affinity to **5**/ODN5 in Table 1.

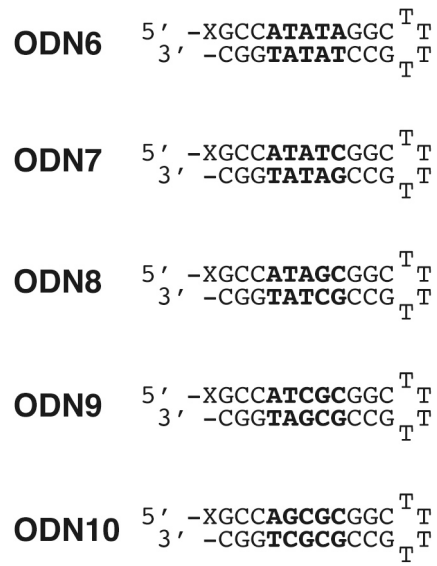

**Figure S1. Sequences of 5'-biotinylated hairpin DNAs (ODN6–10).** X represents biotin. The binding sequences of the Py-Im polyamides are shown in bold.

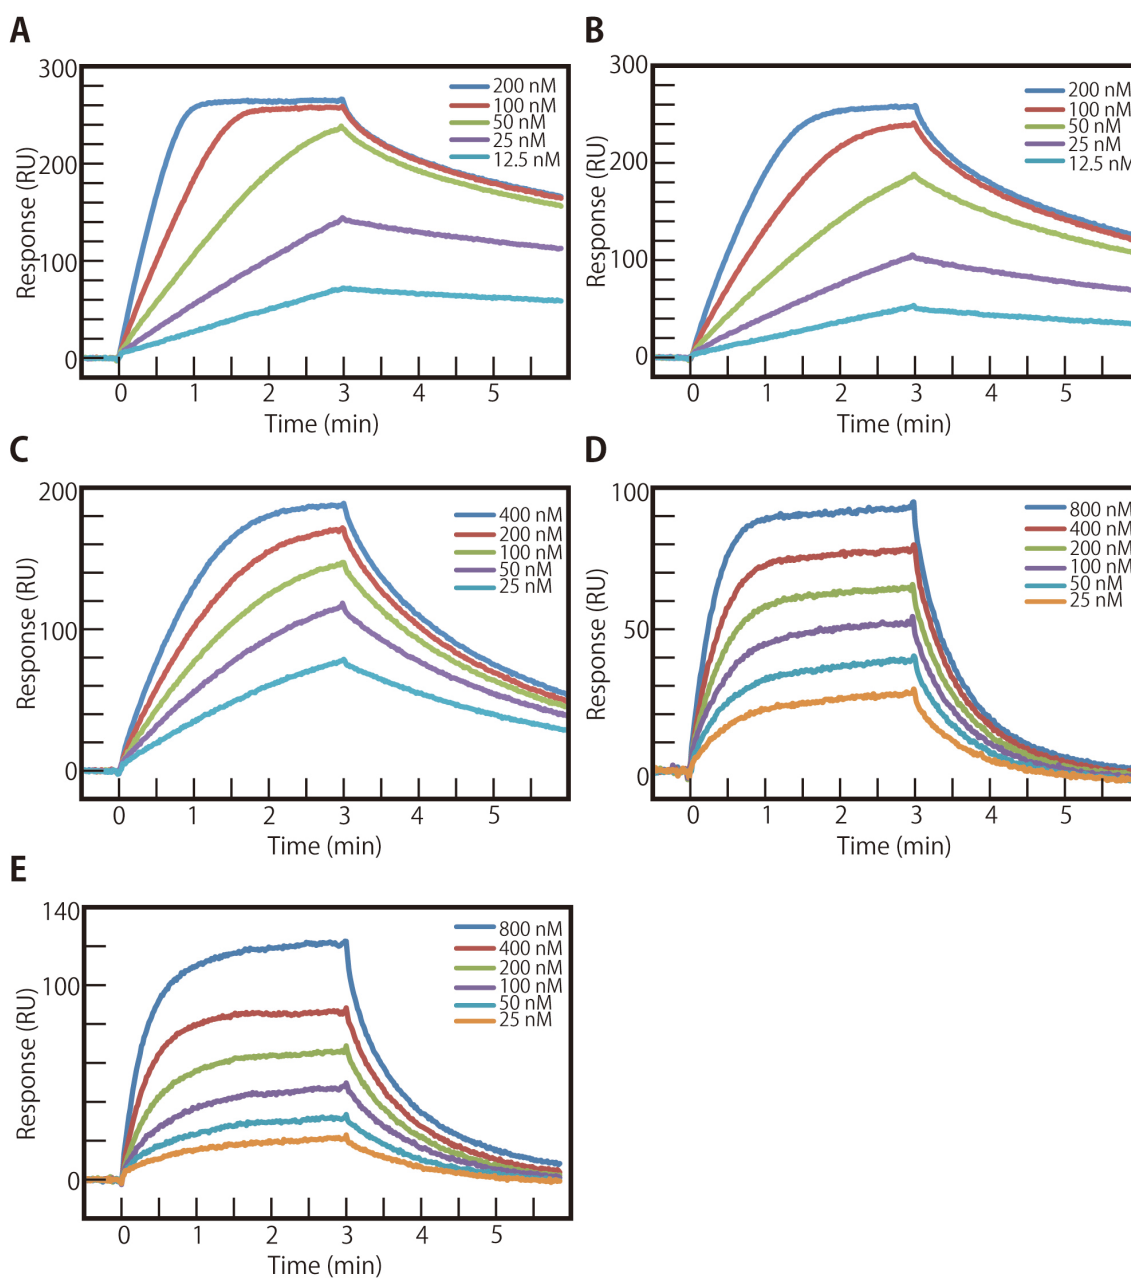

**Figure S2. SPR sensorgrams for the interaction of Py-Im polyamides with hairpin DNAs immobilized on a sensor chip SA.** (A) Py-Im polyamide **1** with ODN6 at a concentration range from  $1.25 \times 10^{-8}$  (lowest curve) to  $2.0 \times 10^{-7}$  M (highest curve). (B) Py-Im polyamide **2** with ODN7 at a concentration range from  $1.25 \times 10^{-8}$  (lowest curve) to  $2.0 \times 10^{-7}$  M (highest curve). (C) Py-Im polyamide **3** with ODN8 at a concentration range from  $2.5 \times 10^{-8}$  (lowest curve) to  $4.0 \times 10^{-7}$  M (highest curve). (D) Py-Im

polyamide **4** with ODN9 at a concentration range from  $2.5 \times 10^{-8}$  (lowest curve) to  $8.0 \times 10^{-7}$  M (highest curve). (E) Py-Im polyamide **5** with ODN10 at a concentration range from  $2.5 \times 10^{-8}$  (lowest curve) to  $8.0 \times 10^{-7}$  M (highest curve).

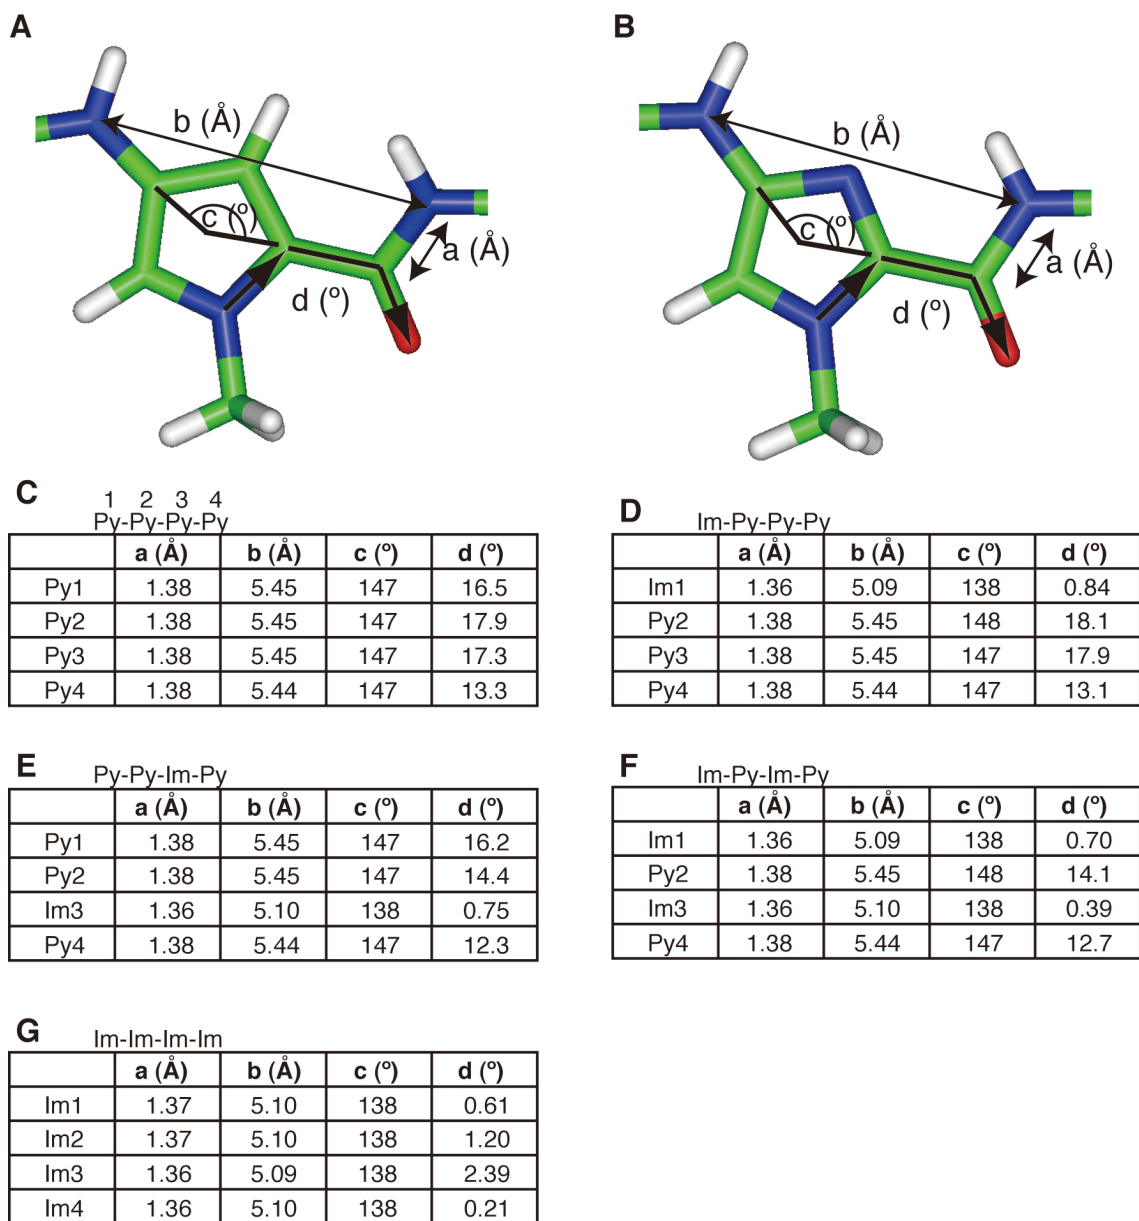

**Figure S3. Measurements of the calculated structures in Figure 4.** (A) Py ring structure. a, b, c, and d indicate the C-N bond length in the contiguous amide, the distance between two Ns in the previous and the contiguous amide, the angle between the two ring-to-amide bonds in the Py ring, and the dihedral angle between the Py ring

and the contiguous amide, respectively. (B) Im ring structure. a, b, c, and d are the same as in (A). (C) The results from Py-Py-Py-Py. (D) The results from Im-Py-Py-Py. (E) The results from Py-Py-Im-Py. (F) The results from Im-Py-Im-Py. (G) The results from Im-Im-Im-Im.

| A<br>1 2 3 4<br>Py-Py-Py-Py |       |       |       |       |
|-----------------------------|-------|-------|-------|-------|
|                             | a (Å) | b (Å) | c (°) | d (°) |
| Py1                         | 1.36  | 5.42  | 146   | 21.0  |
| Py2                         | 1.36  | 5.41  | 146   | 21.0  |
| Py3                         | 1.36  | 5.42  | 146   | 21.1  |
| Py4                         | 1.36  | 5.41  | 146   | 15.6  |

| B<br>Im-Py-Py-Py |       |       |       |       |
|------------------|-------|-------|-------|-------|
|                  | a (Å) | b (Å) | c (°) | d (°) |
| Im1              | 1.34  | 5.06  | 137   | 0.10  |
| Py2              | 1.36  | 5.41  | 146   | 20.4  |
| Py3              | 1.36  | 5.41  | 146   | 20.7  |
| Py4              | 1.36  | 5.41  | 146   | 15.2  |

| C<br>Py-Py-Im-Py |       |       |       |       |
|------------------|-------|-------|-------|-------|
|                  | a (Å) | b (Å) | c (°) | d (°) |
| Py1              | 1.36  | 5.42  | 146   | 20.4  |
| Py2              | 1.36  | 5.41  | 146   | 17.4  |
| Im3              | 1.34  | 5.05  | 137   | 0.53  |
| Py4              | 1.36  | 5.41  | 146   | 15.3  |

| D<br>Im-Py-Im-Py |       |       |       |       |
|------------------|-------|-------|-------|-------|
|                  | a (Å) | b (Å) | c (°) | d (°) |
| Im1              | 1.34  | 5.06  | 137   | 0.11  |
| Py2              | 1.36  | 5.41  | 146   | 17.1  |
| Im3              | 1.34  | 5.05  | 137   | 0.38  |
| Py4              | 1.36  | 5.41  | 146   | 15.1  |

| E<br>Im-Im-Im-Im |       |       |       |       |
|------------------|-------|-------|-------|-------|
|                  | a (Å) | b (Å) | c (°) | d (°) |
| Im1              | 1.35  | 5.06  | 137   | 0.00  |
| Im2              | 1.34  | 5.06  | 137   | 0.23  |
| Im3              | 1.34  | 5.06  | 137   | 0.36  |
| Im4              | 1.34  | 5.07  | 137   | 0.03  |

**Figure S4. Measurements of the structures of 4-ring Py-Im polyamides derived by**

*ab initio* quantum chemical calculation. a, b, c, and d are the same as those in Figure

S1. (A) The results for Py-Py-Py-Py. (B) The results for Im-Py-Py-Py. (C) The results

for Py-Py-Im-Py. (D) The results for Im-Py-Im-Py. (E) The results for Im-Im-Im-Im.
